# IKK2/NFkB signaling controls lung resident CD8 T cell memory during influenza infection

Curtis J. Pritzl<sup>1</sup>, Dezzarae Luera<sup>1</sup>, Karin M. Knudson<sup>1</sup>, Michael J. Quaney<sup>1</sup>, Mark A. Daniels<sup>1,2</sup>, Emma Teixeira<sup>1,2\*</sup>

<sup>1</sup> Department of Molecular Microbiology and Immunology, School of Medicine, University of Missouri, Columbia, MO, United States

<sup>2</sup>Roy Blunt NextGen Precision Health Building, School of Medicine, University of Missouri, Columbia, MO, United States

Email: [teixeiropernase@missouri.edu](mailto:teixeiropernase@missouri.edu)

**Author Contributions:** CJP, DL and KMK performed experiments; CJP, DL and ET analyzed the data; KMK and MJQ generated mice; CJP, MAD and ET made important conceptual contributions; and CJP and ET designed the experiments. ET and MAD wrote the manuscript. MAD and CJP edited the manuscript.

**Competing Interest Statement:** The authors declare no competing interest.

## Abstract

CD8 tissue resident memory ( $T_{RM}$ ) cells are especially suited to control pathogen spread at mucosal sites. However, their maintenance in lung is limited. Here, we found that enhancing NFkB signaling in T cells once memory to influenza is established increased pro-survival Bcl-2 and CD122 levels boosting lung CD8  $T_{RM}$  maintenance. By contrast, enhancing NFkB signals during the contraction phase of the response led to a defect in  $T_{RM}$  differentiation without impairing recirculating memory subsets. Specifically, inducible activation of NFkB via constitutive active IKK2 or tumor necrosis factor (TNF) interfered with tumor growth factor beta (TGF $\beta$ ) signaling resulting in defects of lung CD8  $T_{RM}$  imprinting molecules CD69, CD103, Runx3 and Eomes. Conversely, inhibiting NFkB signals not only recovered but improved the transcriptional signature and generation of lung CD8  $T_{RM}$ . Thus, NFkB signaling is a critical regulator of tissue resident memory, whose levels can be tuned at specific times during infection to boost lung CD8  $T_{RM}$ .

## Introduction

Once infection has resolved, a few of the pathogen specific T cells that participated in the response persist as memory cells providing the host with enhanced protection against re-infection (1-3). These memory T cells strategically relocate to blood and secondary lymphoid organs (central,  $T_{CM}$  and effector,  $T_{EM}$ , memory) as well as portal of entry tissues (tissue resident,  $T_{RM}$ ) each, with specific phenotypes and functions (4). Together, they guarantee the generation of a diverse and polyfunctional T cell memory pool. In contrast to other memory subsets,  $T_{RM}$  cells do not leave tissue, and continue patrolling it for signs of pathogen re-entry. If this happens, they trigger innate immune responses and immediately control reinfection in situ, in tissues like lung, skin or gut(5).  $T_{RM}$  cells have a protective role not only in infectious diseases(6-9), but also in cancer (10-13). Yet, mounting evidence also associates  $T_{RM}$  with pathology in autoimmunity, transplants, and graft versus host disease (14-16). Although this puts  $T_{RM}$  as a therapeutical target to treat disease, there is still poor understanding of how  $T_{RM}$  cells are generated or maintained in tissues. Furthermore, the times during the immune response that are suitable for manipulation of  $T_{RM}$  for therapeutic purposes are still ill defined. This is particularly important in the case of respiratory infections such as influenza that depend on lung-CD8  $T_{RM}$  to control viral titers and disease severity(17, 18) but where CD8  $T_{RM}$  longevity is limited(18).

One of the cardinal features of  $T_{RM}$  cells is their imprinting of non-lymphoid “tissue residency”, which differentiates them from circulating T cells. This is phenotypically characterized by high expression of CD69 and often (but not always) CD103. Transcriptionally, CD8  $T_{RM}$  cells require high expression of Runx3(11), Nr4a1 (19, 20) and low expression of Eomes (21), although depending on the tissue, a balanced expression of other transcription factors, such as Blimp-1 in lung(22), is also important. Signals that occur prior to tissue entry (23) and tissue-specific signals (24) both contribute to the differentiation of  $T_{RM}$ . Among these, antigen and tumor growth factor  $\beta$  (TGF $\beta$ ) signals act at different points of the immune response to shape  $T_{RM}$ (25-31). Yet, the role of inflammation in the generation and maintenance of  $T_{RM}$  remains largely unexplored.

NF $\kappa$ B signaling is a major driver of inflammation (32, 33) as well as one of the signaling pathways induced by T cell receptor signaling upon antigen recognition(34). Multiple pro-inflammatory factors (such as TNF or IL-1 or TLRs), together with antigen, signal through the canonical NF $\kappa$ B pathway at different times during infection (35-37), making it a plausible signaling hub where different environmental cues converge to regulate T cell differentiation and cell fate decisions. Here we sought to understand how changes in the levels of IKK2/NF $\kappa$ B signaling a CD8 T cell experiences during infection impact their memory fate. Our data show that NF $\kappa$ B signaling has a specific role in tissue resident memory that is different from the other recirculating memory subsets. Furthermore, NF $\kappa$ B signaling differentially regulates CD8  $T_{RM}$  differentiation and CD8  $T_{RM}$  maintenance. Interestingly, our data also reveals that tuning NF $\kappa$ B signaling levels at specific times during influenza infection can aid to boost or deplete CD8  $T_{RM}$  in the lung, an organ where these cells gradually vanished over time after vaccination or infection leading to loss in clinical protection(18, 38).

## Results

### Increasing the levels of NF $\kappa$ B signaling after the peak of the response improves circulating CD8 T cell memory.

To address the impact of NF $\kappa$ B signaling on T cell protective immunity, we generated two tetON inducible systems restricted to the T cell lineage. For this, we crossed mice carrying either a constitutively active I $\kappa$ B $\alpha$  allele (CA-IKK2)(39) or a dominant negative-acting version of IKK2 (DN-IKK2)(40) driven by the tetracycline TA-activated promoter (tetO)7 transactivator with mice expressing CD2-driven rtTA(41). We refer to these mice as CD2rtTAxCA-IKK2 and CD2rtTAxDN-

IKK2 respectively (*SI Appendix* Fig. S1 and S2). Expression of CA- and DN- IKK2 can be monitored by a luciferase reporter (either by flow or by luciferase assays) and is restricted to the T cell lineage (*SI Appendix* Fig.S1 and S2C). Furthermore, doxycycline dependent induction of IKK2 results in the upregulation of NFkB dependent genes (CD69 and Eomes)(42, 43) but does not lead to overt T cell apoptosis (no induction of cleaved caspase-3 or FasL) (*SI Appendix* Fig. S2D).

We used these two new inducible models to interrogate whether changing the levels of IKK2/NFkB signaling in T cells during specific phases of the immune response impacts CD8 T cell memory. We tested whether boosting (or inhibiting) IKK2/NFkB signal transduction could modulate the establishment of circulating CD8 memory in two different polyclonal models of infection. For this, we used both tetON IKK2 inducible models and manipulated NFkB signaling after the peak of the T cell response following on previous reports suggesting a role for p65NFkB transcriptional activity during the contraction phase of the immune response to *L. monocytogenes* (42, 44). We found that inhibition of NFkB signaling, during the contraction phase of the immune response to influenza infection, led to a loss of circulating CD8 T cell memory. By contrast, increasing NFkB signaling resulted in a considerable increase in the number of polyclonal antigen specific memory CD8 T cells generated, both against influenza A (IAV) and VSV virus infection (*SI Appendix* Fig.S2E-H). From these data, we concluded that IKK2/NFkB signaling has a critical role in the establishment of CD8 T cell memory upon infection and most importantly, that increasing the levels of this signaling pathway in T cells at the end of the immune response improves the generation of CD8 T cell memory cells.

### **IKK2/NFkB signaling differentially regulates T cell memory subset diversity.**

Since CD8 T cell memory is composed of different subsets with unique locations and phenotypes, we next asked whether the impact of IKK2/NFkB signaling would equally affect all T cell memory subsets. Using our inducible models, we infected mice with X31 IAV and allowed CD8 T cells to differentiate for 5 days after which, we either increased or decreased NFkB signaling in T cells by feeding mice with doxycycline chow during the contraction phase of the immune response. Then, we measured the frequency and number of IAV specific CD8 T<sub>CM</sub>, T<sub>EM</sub> and T<sub>RM</sub> generated (Fig. 1A). Inhibition of NFkB signaling during contraction, impaired the generation of both T<sub>CM</sub> and T<sub>EM</sub>. However, increasing NFkB signaling, improved only the generation of IAV specific T<sub>CM</sub> (Fig. 1B, C). Most strikingly, when we examined the generation of lung T<sub>RM</sub>, we observed that NFkB signaling had opposite effects on this T cell subset. Generation of NP<sub>366</sub> and PA<sub>224</sub> IAV antigen specific lung CD8 T<sub>RM</sub> was decreased under high levels of NFkB signals. On the contrary, decreasing NFkB signaling resulted in a dramatic boost in the generation of polyclonal lung IAV (NP and PA) specific CD8 T<sub>RM</sub> (Fig 1D,E). This was not exclusive to the lung or the type of infection as the same results were observed for IAV specific CD8 T<sub>RM</sub> in spleen (Fig. 1F) and kidney in the context of systemic VSV infection (Fig. 1G). Of note, increasing NFkB levels did not result in an overall decrease in the number of CD8 or CD4 T cells in the lung, indicating that the effects of increasing NFkB signaling levels were restricted to antigen specific CD8 T cells (Fig. 2B,C). We also did not observe important defects in the lung IAV- specific CD4 T cell memory compartment when NFkB signals were increased, suggesting that the impairment in CD8 T<sub>RM</sub> generation we found was not due to a defect in CD4 T cells (Fig. 2D). Finally, we used an adoptive transfer model to confirm whether the effect of NFkB signaling was CD8 T cell intrinsic. In response to both, influenza and i.n. VSV infection we found that increasing NFkB signaling specifically in CD8 T cells during the contraction phase led to a severe loss in antigen specific lung CD8 T<sub>RM</sub> (Fig. 2E,F). Altogether these data reveal that IKK2/NFkB signaling is a critical pathway in the regulation of CD8 T cell memory subset diversity.

Most importantly, our data suggest that manipulating NFkB signaling could deplete or boost CD8 T<sub>RM</sub> in tissue.

### **Increasing IKK2 signaling impairs protection against heterologous infections.**

CD8 T<sub>RM</sub> are critical to provide protection in tissue against re-infection. We, thus, tested whether increasing the amount of NFkB signaling in CD8 T cells as they differentiate to T<sub>RM</sub> would impact protective immunity in the lung. For this, we followed a published approach to deplete circulating CD8 T cells while sparing CD8 T<sub>RM</sub>. (45). We adoptively transferred OT-1 naïve male T cells into female or male congenically marked hosts, followed by intranasal VSV-OVA infection (Fig. 3A). Consistent with rejection against male antigen, male donors vanished in female but not in male hosts (Fig. 3B,C). These conditions allowed us to singularly evaluate the T cell protective ability of antigen specific lung CD8 T<sub>RM</sub> generated under high levels of NFkB signaling. Consistent with our results in Fig. 2, high levels of NFkB signaling (CA-IKK2<sup>ON</sup> model) led to a loss of CD8 T<sub>RM</sub> (Fig. 3D). However, female hosts bearing only male CA-IKK2<sup>ON</sup> CD8 T<sub>RM</sub> cells exhibited ~200 times higher virus titers than their control counterparts upon heterologous infection in the lung. This was despite better effector function (Fig 3E,F). These data, thus, show that loss of CD8 T<sub>RM</sub> due to high levels of NFkB signaling impairs protective immunity in the lung.

### **IKK2/NFkB signaling interferes with late CD8 T<sub>RM</sub> transcriptional programming.**

Recent reports suggest that CD8 T<sub>RM</sub> development results from a combination of signals that T cells received before tissue entry and signals that occur later at tissue (23, 46-48). In our model, NFkB signals were over-induced after the peak of infection coinciding with a time where some effector antigen specific T cells are being recruited to tissue while others are continuing their differentiation in tissue. We, thus, explored at which time during the contraction phase CD8 T<sub>RM</sub> loss began in CA-IKK2<sup>ON</sup> CD8 T cells. For this, we repeated similar experiments to the ones in Fig. 1 and monitored the frequency and number of CD69<sup>+</sup> CA-IKK2<sup>ON</sup> and control CD8<sup>+</sup> T<sub>RM</sub> in lung at day 10 p.i and 30 p.i. (Fig. 4A). We found that the loss of CA-IKK2<sup>ON</sup> CD8 T<sub>RM</sub> occurred between day 10 and day 30 p.i. (Fig. 4B, C). The loss of CD8 T<sub>RM</sub> correlated with a reduction in the number of CD8 T<sub>RM</sub> expressing the T<sub>RM</sub> tissue markers CD69 and CD103 (Fig 4C, D). Since we did not observe any defect in the number of circulating memory CD8 T cells in the lung (Fig. 4F) or in the expression of CXCR3, one of the chemokine receptors important for lung recruitment (Fig. 4E)(49), we concluded that NFkB signals must interfere with lung tissue signals that are important for the establishment of CD8 T<sub>RM</sub>.

We also assessed whether the defect in the establishment of the CA-IKK2<sup>ON</sup> CD8 T<sub>RM</sub> pool was a consequence of T<sub>RM</sub> transcriptional programming and/or survival. CD8 T<sub>RM</sub> differentiation requires downregulation of T-box transcription factors Eomes and T-bet (21, 50), induction of Runx3 and Nur77(11) and Blimp-1 in the lung(22) while some studies attribute a role for IL-15 in the homeostasis/survival of CD8 T<sub>RM</sub> in tissue (26, 51, 52). We observed that CA-IKK2<sup>ON</sup> CD8 T<sub>RM</sub> expressed higher levels of T-bet and Eomes than their control counterparts. However, they exhibited reduced levels of Nur77 and Runx3 and normal levels of Blimp-1 (Fig. 4G and S/ Appendix Fig.S3). Conversely, DN-IKK2<sup>ON</sup> CD8 T<sub>RM</sub> exhibited a reversion of the levels of Nur77 and Eomes and an induction of Runx3 over control levels (Fig. 4G). The expression of CD122, one of the chains of the IL-15R, was also impaired in CA-IKK2<sup>ON</sup> CD8 T<sub>RM</sub> cells. (Fig.4G). Collectively, these data support the idea that NFkB signaling regulates CD8 T<sub>RM</sub> transcriptional programming and the imprinting of the CD8 T<sub>RM</sub> signature.

### **NFkB signaling inhibits TGFβ signaling required for CD8 T<sub>RM</sub> signature molecules.**

The fact that the number of CA-IKK2<sup>ON</sup> CD8 T<sub>RM</sub> cells started to decrease late in the immune response and that this coincided with changes in T<sub>RM</sub> associated transcription factors (Eomes and Runx3) that are regulated by tissue cues (24, 46), led us to hypothesize that NFkB signaling could be inhibiting tissue signals that are required for lung CD8 T<sub>RM</sub> differentiation. TGFβ is a crucial

cytokine for tissue resident memory differentiation and plays a specific role in lung. Moreover, both Runx3 and CD103 are downstream targets of TGF $\beta$  signaling (53, 54), and our data showed defects in both T<sub>RM</sub> markers in CA-IKK2<sup>ON</sup> CD8 T<sub>RM</sub> cells (Fig. 4). Therefore, we tested whether NF $\kappa$ B signaling could inhibit TGF $\beta$  signaling in differentiating CD8 T cells (Fig. 5). For this, we used two inducible models where IKK2 signaling can be increased in CD8 T cells. CD8 T cells that were exposed to TGF $\beta$  while NF $\kappa$ B signaling was over-induced indeed expressed lower levels of CD103 and Runx3 than TGF $\beta$  controls (Fig. 5A). Furthermore, increasing NF $\kappa$ B signaling also resulted in defective canonical (phosphorylated Smad2/3) and non-canonical (phosphorylated ERK) TGF $\beta$  signal transduction (Fig 5B,C, *SI Appendix Data Fig.S4*). In other cell types, NF $\kappa$ B can interfere with TGF $\beta$  signals through the expression of the inhibitory protein Smad7(55). Thus, we determined the levels of Smad7 under the different conditions. Consistent with the idea that NF $\kappa$ B signals can induce Smad7 in T cells and thereby inhibit TGF $\beta$  signaling, we observed that CD8 T cells under high NF $\kappa$ B signaling upregulated Smad7 expression as p-Smad2/3 and pERK levels decreased (Fig. 5C). Collectively, these data shows that IKK2/NF $\kappa$ B signaling can negatively regulate TGF $\beta$  signaling and the CD8 T<sub>RM</sub> markers, Runx3 and CD103.

### **TNF-mediated NF $\kappa$ B signaling inhibits TGF $\beta$ signaling for T<sub>RM</sub>.**

NF $\kappa$ B signaling is a mediator of inflammatory signals during respiratory infections(56-58). One of the most understood NF $\kappa$ B triggers is the pro-inflammatory cytokine TNF, which has been associated to T<sub>RM</sub> in the lung (59) and signals through the canonical NF $\kappa$ B pathway(35). Based on these, we hypothesized that TNF could, via NF $\kappa$ B, inhibit TGF $\beta$  signaling and impair CD8 T<sub>RM</sub>. To assess this, we designed an experiment where CD8 T cells differentiating in the presence of TNF were exposed to TGF $\beta$  and then, measured changes in TGF $\beta$  signaling as well as T<sub>RM</sub> markers downstream of TGF $\beta$ , Runx3 and CD103. As expected, TNF did not induce TGF $\beta$  signaling or the expression of Runx3 and CD103 while TGF $\beta$  did. However, consistent with the idea that TNF inhibits TGF $\beta$  signaling, CD8 T cells differentiating in the presence of TGF $\beta$  were impaired in the phosphorylation of Smad2/3 and the expression of Runx3 or CD103 when TNF was present (Fig. 5D-G).

To confirm whether the ability of TNF to inhibit TGF $\beta$  signaling was NF $\kappa$ B dependent, we repeated the same experiments with DN-IKK2<sup>ON</sup> CD8 T cells and use doxycycline to inhibit NF $\kappa$ B signaling. Confirming our hypothesis, DN-IKK2<sup>ON</sup> CD8 T cells remain unresponsive to the effects of TNF on TGF $\beta$  signaling (Fig. 5D-G). Thus, TNF inhibits TGF $\beta$  signaling and proteins crucial for CD8 T<sub>RM</sub> via NF $\kappa$ B.

We also assessed whether TNF and NF $\kappa$ B signaling could affect the induction of other transcription factors important for lung CD8 T<sub>RM</sub>. Blimp-1 was not affected by TNF and/or TGF $\beta$ . By contrast, T-bet and Eomes were. Remarkably, Eomes expression was inhibited by TGF $\beta$  (60) and neither TNF nor inhibiting NF $\kappa$ B signaling could revert it (Fig. 5H). In summary, these results support the idea that pro-inflammatory cytokines able to induce NF $\kappa$ B, such as TNF, can inhibit TGF $\beta$  signals in CD8 T cells and, thereby, impair their differentiation towards the CD8 T<sub>RM</sub> fate (Fig. 5I).

### **At memory, NF $\kappa$ B signaling promotes lung CD8 T<sub>RM</sub> survival.**

Upon influenza infection, lung CD8 T<sub>RM</sub> cells fail to persist weakening protective immunity against the same or other influenza variants (18, 61). In prior work using NF $\kappa$ B pharmaceutical inhibitors, it was found that once memory CD8 T cells are generated their maintenance depended on NF $\kappa$ B signals(42). Although these studies did not distinguish between the different T cell memory subsets, the data conflicted with our findings that enhanced NF $\kappa$ B signaling is detrimental to CD8 T<sub>RM</sub> differentiation (Fig. 1 and 4). Therefore, we decided to address the impact of NF $\kappa$ B signaling on CD8 T<sub>RM</sub> at memory once memory T cells have been formed. For this, we used the CA-IKK2<sup>ON</sup> inducible model and allowed the generation of CD8 T<sub>RM</sub> in the lung upon IAV infection. 30 d.p.i, we compared control and doxycycline-treated mice for changes in the number of CD8 T<sub>RM</sub> in the lung. We observed a ~ 6-fold increase in the number of IAV specific CD8 T<sub>RM</sub> cells in the lung when



NFkB signaling had been induced (Fig. 6A). Strikingly, this was the opposite effect that increasing NFkB signals during contraction had in CD8 T<sub>RM</sub> generation (Fig. 1). The increase in CA-IKK2<sup>ON</sup> CD8 T<sub>RM</sub> at memory correlated with higher levels of CD122 and Bcl-2, suggesting NFkB signals at memory mediate CD8 T<sub>RM</sub> survival (Fig. 6B).

In most tissues T<sub>RM</sub> maintenance is independent of the input of circulating memory T cells (62, 63) although, in the lung this is still controversial (61, 64). Curiously in our studies, increasing NFkB signals at memory only boosted the frequency of IAV specific CD8 T<sub>RM</sub> in the lung. The frequency of IAV specific circulating memory T cells remain unaltered (Fig. 6C), suggesting NFkB signals improve CD8 T<sub>RM</sub> maintenance in the lung by supporting CD8 T<sub>RM</sub> survival.

Finally, NFkB signaling at memory was also beneficial for the CD8 central memory pool as we also observed a significant increase in the number of IAV specific CD8 T<sub>CM</sub> in draining lymph nodes after doxycycline treatment (Fig. 6. D, E). Together, these data reveal that NFkB signaling differentially affects tissue resident memory depending on the stage of differentiation of the CD8 T cell (before and after becoming CD8 T<sub>RM</sub>). Most importantly, our results support the idea that enhancing NFkB signaling in CD8 T cells once the T<sub>RM</sub> pool has been established could improve CD8 T<sub>RM</sub> maintenance in tissue.

## Discussion

T cell memory in tissues is an essential part of mucosal immunity that protects against infection and disease. Here we show that the pro-inflammatory signaling pathway IKK2/NFkB, is critical for both the generation and maintenance of the CD8 T<sub>RM</sub> pool after infection. Our results, mainly refer to influenza specific CD8 T<sub>RM</sub> in the lung, a tissue where maintaining a long-lived CD8 T<sub>RM</sub> pool is crucial for protective immunity(18) but challenging, due to the CD8 T<sub>RM</sub> short life-span (65). The reasons why resident memory CD8 T cells are short-lived in the lung but not in other tissues are still unclear. However, our work suggests that boosting NFkB signaling at the end of the immune response might offer a therapeutic avenue to increase CD8 T<sub>RM</sub> survival and protective immunity upon infection or vaccination. Furthermore, since improved survival also occurred for CD8 T<sub>CM</sub> of the draining lymph nodes, this suggests a controlled increase in NFkB signaling could boost several subsets of the T cell memory pool.

It is striking that the same signaling pathway, NFkB, operates in opposite manners for CD8 T cells depending on their differentiation stage (during T<sub>RM</sub> differentiation and at memory). This could be due to epigenetic modifications that regulate the accessibility of NFkB to specific gene loci depending on the differentiation stage of a CD8 T cell. Alternatively, changes in the environmental cues as the infection resolves could also explain the differential impact on CD8 T<sub>RM</sub> when levels of NFkB signaling increase. Although our findings cannot distinguish between these two possibilities, our data suggest that NFkB signaling does interfere with TGFβ to skew CD8 T effectors away from T<sub>RM</sub>. TGFβ is a universal driver of CD8 T<sub>RM</sub> whose levels in tissue can change depending on age and in the context of diseases such as infection, autoimmunity, asthma, or fibrosis(66). Importantly, multiple signals can also locally trigger the induction of NFkB signaling in CD8 T cells, including antigen, TLRs and pro-inflammatory cytokines(35-37). We show that TNF, a known driver of NFkB (35) is able to inhibit TGFβ b-dependent signaling and T<sub>RM</sub> programming in CD8 T cells. TNF and other pro-inflammatory cytokines such as IL-6 are heavily produced in pathological settings of chronic inflammation and could easily affect the levels of NFkB signals(67-69) a CD8 T cell experience in tissue. For the CD8 T cells that also encounter TGFβ locally, this could decrease their likelihood to become CD8 T<sub>RM</sub>. Further evaluation of the dynamics of CD8 T<sub>RM</sub> during infections with a strong pro-inflammatory profile could provide insight into how overt inflammation may affect long-term immunity and inform of specific therapeutics targeting NFkB or its pro-inflammatory drivers to either boost or deplete tissue resident memory. This might be especially relevant in the context of immune treatments that are linked to high levels of inflammation and that in the case of cancer(70, 71) or autoimmunity (RA) have a T<sub>RM</sub> component that affects disease outcome (14, 72). In the same line, it would also be important to evaluate how current treatments

targeting TNF or NFkB signaling in the Clinic, affect the establishment of tissue resident memory in patients.

We also found that NFkB signaling did not affect CD8 T<sub>RM</sub> in the same manner as it did CD8 T<sub>CM</sub> or T<sub>EM</sub> development, indicating that NFkB signaling is a key regulator of T cell memory diversity. Modulation of NFkB signaling levels may serve as an opportunity to regulate specific T cell memory subsets depending on their role in disease. Finally, our findings also underscore the impact that fluctuating levels of a single signaling pathway can have on the quality of T cell memory depending how and when during the infection these levels change. This may be particularly important for pleiotropic signaling pathways such as NFkB where multiple stimuli feed in (including patient's treatments) and can easily add up to shape T cell fate. Incorporating this concept into current vaccine strategies could aid to improve their long-term efficacy.

## Materials and Methods

**Mice.** OT-1Thy1.1+ TCR transgenic strain, C57BL/6J (B6), B6.SJL-*Ptprca*<sup>a</sup> *Pepcb*<sup>b</sup>/BoyJ (CD45.1 congenic C57BL/6), B6.Cg-*Gt(ROSA)26Sor<sup>tm4(lkbbk)Rsky</sup>/J* (IKK2-CA<sup>fl/fl</sup>), B6 -Tg (GzB-cre)1Jcb/J (GzB-Cre) mice (Jackson Laboratory, Bar Harbor, ME) along with OT-1Thy1.1XIKK2CA<sup>fl/fl</sup> xGzB<sup>Cre</sup>; CD2rtTA x CA-IKK2 (tetracycline-inducible constitutive active IKK2) and CD2rtTA x DN-IKK2 (tetracycline-inducible dominant negative IKK2) mice were maintained under specific pathogen-free conditions at the University of Missouri. All mouse strains were screened for transgene homozygosity by PCR. Mice were aged between 8-13 weeks at the time of infection. Infection and maintenance of mice infected with influenza virus or vesicular stomatitis virus occurred in an ABSL2 facility at the University of Missouri. All animal procedures were conducted according to the NIH guidelines for the care and use of laboratory animals and were approved by the University of Missouri Institutional Animal Care and use Committee.

**Reagents and antibodies.** Biotinylated, influenza-specific monomers (H-2Db NP366-374 ASNENMETM, H-2D<sup>b</sup> PA224-233 SSLENFRAYV, I-A<sup>b</sup> NP311-325 QVYSLIRPNENPAHK) were obtained from the NIH Tetramer Core Facility (Atlanta, GA). Biotinylated H-2K<sup>b</sup> monomers for OVA (SIINFEKL) and VSV NP52-59 (RGYVYQGL) were generated in our laboratory. Biotinylated monomers were tetramerized using fluorescently labeled streptavidin (Biolegend, San Diego, CA). Doxycycline containing diet (6 g/kg) was purchased from Envigo (Indianapolis, IN). For Flow cytometry we used antibodies anti- CD8 (53-6.7), CD4 (L3T4), CD45.2 (104), CD44 (IM7), CD62L(MEL-14), TNF (MP6-XT22) and CXCR3 (CXC3-173) from Biolegend; anti- CD103 (M290), CD69 (H1.2F3), CD122 (TM-b1), Blimp1 (6D3), T-bet (O4-46), IFN-γ(XMG1.2) and Phospho-SMAD2/3 from BD Biosciences; anti-Runx3 (527327) from R&D systems; anti-Eomes (Dan11mag) from Thermo Scientific and anti-Luciferase from Rockland, Inc. For western blotting and immunostaining we used antibodies anti- phosphorylated-SMAD2(Ser465/Ser467) (E8F3R), SMAD2/3 (D7G7), phosphorylated ERK1/2 from Cell Signaling; anti- SMAD7(293739) from R&D Systems; anti- α-tubulin (B-5) from Sigma and secondary antibodies goat anti- mouse and anti-rabbit from Li-Cor Biotechnology.

**Virus infections.** Mice were infected intranasally with 1000 pfu Influenza A/HKx-31 (X31,H3N2) for sublethal infection or intravenously with vesicular stomatitis virus (VSV) (2x10<sup>6</sup> pfu), unless otherwise indicated in Figure legends. For heterologous infection experiments, mice were primed intranasally with 5x10<sup>4</sup> pfu VSV-OVA, then challenged 30 days later with 5000 pfu of influenza A/PR8-OVA (PR8, H1N1).

**Viral titers.** The TCID<sub>50</sub> of influenza virus was determined using MDCK cells as described (74). Briefly, lung samples were homogenized using a Mini-BeadBeater (BioSpec, Bartlesville, OK) and cleared homogenate was used to inoculate confluent MDCK cell monolayers. 24 hours post inoculation, the supernatant was discarded and replaced with fresh media (DMEM containing

0.0002% Trypsin). Agglutination of chicken RBCs (Rockland Immunochemicals Inc., Limerick, PA) was utilized to determine the presence of influenza virus after 3 days of culture.

***In vivo* antibody labeling and flow cytometry.** For *in vivo* antibody labeling and differentiation of T cells circulating in the vasculature or resident in parenchyma (TRM) tissues, three minutes before being killed, mice were injected intravenously via tail vein injection with 2 mg PE-labeled CD45.2 (clone 104) or PE-labeled CD8b, (clone Ly-3). Lungs, kidney, spleen, and mediastinal lymph node tissues were harvested, and lymphocytes isolated. Next, lymphocytes were stained *in vitro* with anti-CD8 $\alpha$  antibodies along with antibodies to other surface and intracellular markers conjugated to fluorochromes. Stained cells were run on a LSR Fortessa flow cytometer (BD, San Jose, CA), and analyzed using with FlowJo software (Tree Star, Inc., Ashland, OR).

**Intracellular cytokine staining.** Lymphocytes were isolated from the lungs of VSV-OVA-challenged mice and stimulated *ex vivo* with OVA peptide 1 mM in the presence of Golgi-Plug (BD Biosciences) for 5 hours. Following incubation, cells were harvested and antigen specific CD8<sup>+</sup> T cells were assessed for the expression of TNF and IFN $\gamma$  by flow cytometry.

**CD8 T cell enrichment and adoptive transfer.** Splenocytes were harvested from CD2rtTA x CA-IKK2 mice and polyclonal CD8 T cells were purified by magnetic selection (CD8 T cell isolation kit by Miltenyi Biotech Auburn, CA).  $5 \times 10^5$  CD8 polyclonal or  $10^4$  OT-1Thy1.1XIKK2CA<sup>fl/fl</sup> xGzB<sup>Cre</sup> monoclonal naïve T cells were adoptively transferred into congenic C57BL/6 mice 1 day prior to intranasal infection with influenza or VSV-OVA virus respectively.

***In vitro* culture and cytokine stimulation.** Splenocytes isolated from OT-1Thy1.1XIKK2CA<sup>fl/fl</sup> xGzB<sup>Cre</sup> mice were stimulated with 20 nM OVA peptide for 48 hours at a concentration of  $1 \times 10^6$  cells/ml. TGF $\beta$  (R&D Systems, Minneapolis, MN) was then added to a final concentration of 50 ng/ml. At 30 minutes and 24 hours post TGF $\beta$  stimulation, cells were harvested for analysis by flow cytometry and western blotting. Splenocytes from CD2rtTA x DN-IKK2 mice were stimulated *in vitro* at  $1 \times 10^6$  cells/ml with 10 mg/ml anti-CD3 (clone 145-2C11) and 10 mg/ml anti-CD28 (clone 37.51) (ThermoFisher Scientific, Waltham, MA). Following 24 hours of stimulation, cells were divided and incubated in the presence or absence of 125 ng/ml recombinant TNF (R&D Systems, Minneapolis, MN) for 24 additional hours. The cells were again divided and incubated in the presence or absence of 50 ng/ml TGF $\beta$  (R&D Systems, Minneapolis, MN). Cells were harvested at 30 minutes and 24 hours post addition of TGF $\beta$  and analyzed by flow cytometry.

**Western blotting.** *In vitro* stimulated cells were lysed in lysis buffer containing 10mM HEPES, 10mM KCl, 0.1mM EDTA, 0.2mM EGTA, 0.5% NP40, 1mM DTT, 2 mM Na<sub>3</sub>VO<sub>4</sub>, 20 mM NaF, 1 mg/ml Leupeptin, 1 mg/ml Aprotinin, 1 mM PMSF. Samples were resolved on a 10% SDS-PAGE gel and transferred to nitrocellulose membrane. Membranes were blocked with Blotting Grade Blocker (Bio-Rad, Hercules, CA) and probed with specific primary and secondary antibodies. Blots were imaged on a Li-Cor Odyssey XF (Li-Cor, Lincoln, NE) and analyzed using Image Studio (Li-Cor, Lincoln, NE).

**Statistical analysis.** Statistical analysis was performed using the Prism software (GraphPad). Data are presented as mean  $\pm$  standard deviation. Statistical significance to compare two quantitative groups was evaluated using a two-tailed t test. A value for significance of  $p < 0.05$  was used throughout the study, and statistical thresholds of 0.05, 0.005, 0.0005, as well as 0.0001 are indicated in the figures signified via asterisks (as described in the figure legends).

## Acknowledgments



We thank Dr. Nick Goplen and Dr. Vikas Saxena for discussion and Bianca Gordon for screening. We thank Dr. Zamoyska, Dr. Bruce Richardson, and Faith Strickland for generously providing us with CD2rtTA mice. Bernd Baumann, Dr. Thomas Wirth for generously providing us with IKK2-CA and IKK2-DN mouse strains. MU Office of Research and School of Medicine animal vivarium staff for assistance with mice. Kathy Schreiber and Daniel Jackson for assistance in the Flow Cytometry Core Facility. Supported by National Institutes of Health grants R01 AI110420-01A1 and R56 AI110420-06A1, 1U01CA244314 as well as Internal funding from the School of Medicine (ET).

## References

1. R. Ahmed, D. Gray, Immunological memory and protective immunity: understanding their relation. *Science* **272**, 54-60 (1996).
2. R. W. Dutton, L. M. Bradley, S. L. Swain, T cell memory. *Annu Rev Immunol* **16**, 201-223 (1998).
3. R. M. Zinkernagel *et al.*, On immunological memory. *Annu Rev Immunol* **14**, 333-367 (1996).
4. S. C. Jameson, D. Masopust, Understanding Subset Diversity in T Cell Memory. *Immunity* **48**, 214-226 (2018).
5. D. Masopust, A. G. Soerens, Tissue-Resident T Cells and Other Resident Leukocytes. *Annu Rev Immunol* **37**, 521-546 (2019).
6. X. Wu, P. Wu, Y. Shen, X. Jiang, F. Xu, CD8(+) Resident Memory T Cells and Viral Infection. *Front Immunol* **9**, 2093 (2018).
7. M. M. Wilk, K. H. G. Mills, CD4 TRM Cells Following Infection and Immunization: Implications for More Effective Vaccine Design. *Front Immunol* **9**, 1860 (2018).
8. V. Muruganandah, H. D. Sathkumara, S. Navarro, A. Kupz, A Systematic Review: The Role of Resident Memory T Cells in Infectious Diseases and Their Relevance for Vaccine Development. *Front Immunol* **9**, 1574 (2018).
9. J. M. O'Hara *et al.*, Generation of protective pneumococcal-specific nasal resident memory CD4(+) T cells via parenteral immunization. *Mucosal immunology* **13**, 172-182 (2020).
10. M. Nizard *et al.*, Induction of resident memory T cells enhances the efficacy of cancer vaccine. *Nature communications* **8**, 15221 (2017).
11. J. J. Milner *et al.*, Runx3 programs CD8(+) T cell residency in non-lymphoid tissues and tumours. *Nature* **552**, 253-257 (2017).
12. B. T. Malik *et al.*, Resident memory T cells in the skin mediate durable immunity to melanoma. *Sci Immunol* **2** (2017).
13. M. Enamorado *et al.*, Enhanced anti-tumour immunity requires the interplay between resident and circulating memory CD8(+) T cells. *Nature communications* **8**, 16073 (2017).
14. H. Wu *et al.*, Pathogenic role of tissue-resident memory T cells in autoimmune diseases. *Autoimmun Rev* **17**, 906-911 (2018).
15. J. Strobl *et al.*, Long-term skin-resident memory T cells proliferate in situ and are involved in human graft-versus-host disease. *Sci Transl Med* **12** (2020).
16. M. E. Snyder *et al.*, Generation and persistence of human tissue-resident memory T cells in lung transplantation. *Sci Immunol* **4** (2019).
17. S. Sridhar *et al.*, Cellular immune correlates of protection against symptomatic pandemic influenza. *Nat Med* **19**, 1305-1312 (2013).
18. T. Wu *et al.*, Lung-resident memory CD8 T cells (TRM) are indispensable for optimal cross-protection against pulmonary virus infection. *J Leukoc Biol* **95**, 215-224 (2014).
19. C. S. Boddupalli *et al.*, Interlesional diversity of T cell receptors in melanoma with immune checkpoints enriched in tissue-resident memory T cells. *JCI insight* **1**, e88955 (2016).

20. J. Li, M. Olshansky, F. R. Carbone, J. Z. Ma, Transcriptional Analysis of T Cells Resident in Human Skin. *PLoS One* **11**, e0148351 (2016).
21. L. K. Mackay *et al.*, T-box Transcription Factors Combine with the Cytokines TGF-beta and IL-15 to Control Tissue-Resident Memory T Cell Fate. *Immunity* **43**, 1101-1111 (2015).
22. F. M. Behr *et al.*, Blimp-1 Rather Than Hobit Drives the Formation of Tissue-Resident Memory CD8(+) T Cells in the Lungs. *Front Immunol* **10**, 400 (2019).
23. V. Mani *et al.*, Migratory DCs activate TGF-beta to precondition naive CD8(+) T cells for tissue-resident memory fate. *Science* **366** (2019).
24. C. J. Pritzl, M. A. Daniels, E. Teixeira, Interplay of Inflammatory, Antigen and Tissue-Derived Signals in the Development of Resident CD8 Memory T Cells. *Front Immunol* **12**, 636240 (2021).
25. K. A. Casey *et al.*, Antigen-independent differentiation and maintenance of effector-like resident memory T cells in tissues. *Journal of immunology (Baltimore, Md : 1950)* **188**, 4866-4875 (2012).
26. L. K. Mackay *et al.*, The developmental pathway for CD103(+)CD8+ tissue-resident memory T cells of skin. *Nat Immunol* **14**, 1294-1301 (2013).
27. B. S. Sheridan *et al.*, Oral infection drives a distinct population of intestinal resident memory CD8(+) T cells with enhanced protective function. *Immunity* **40**, 747-757 (2014).
28. T. Hirai *et al.*, Competition for Active TGFbeta Cytokine Allows for Selective Retention of Antigen-Specific Tissue- Resident Memory T Cells in the Epidermal Niche. *Immunity* **54**, 84-98 e85 (2021).
29. T. N. Khan, J. L. Mooster, A. M. Kilgore, J. F. Osborn, J. C. Nolz, Local antigen in nonlymphoid tissue promotes resident memory CD8+ T cell formation during viral infection. *J Exp Med* **213**, 951-966 (2016).
30. A. Yoshizawa *et al.*, TCR-pMHC encounter differentially regulates transcriptomes of tissue-resident CD8 T cells. *Eur J Immunol* **48**, 128-150 (2018).
31. S. Takamura, Persistence in Temporary Lung Niches: A Survival Strategy of Lung-Resident Memory CD8(+) T Cells. *Viral Immunol* **30**, 438-450 (2017).
32. E. Jimi, I. Strickland, R. E. Voll, M. Long, S. Ghosh, Differential role of the transcription factor NF-kappaB in selection and survival of CD4+ and CD8+ thymocytes. *Immunity* **29**, 523-537 (2008).
33. M. Long, S. G. Park, I. Strickland, M. S. Hayden, S. Ghosh, Nuclear factor-kappaB modulates regulatory T cell development by directly regulating expression of Foxp3 transcription factor. *Immunity* **31**, 921-931 (2009).
34. S. Paul, B. C. Schaefer, A new look at T cell receptor signaling to nuclear factor-kappaB. *Trends in Immunology* 10.1016/j.it.2013.02.002 (2013).
35. M. S. Hayden, S. Ghosh, Regulation of NF-kappaB by TNF family cytokines. *Semin Immunol* **26**, 253-266 (2014).
36. V. Tergaonkar, R. G. Correa, M. Ikawa, I. M. Verma, Distinct roles of IkappaB proteins in regulating constitutive NF-kappaB activity. *Nat Cell Biol* **7**, 921-923 (2005).
37. H. Yu, L. Lin, Z. Zhang, H. Zhang, H. Hu, Targeting NF-kappaB pathway for the therapy of diseases: mechanism and clinical study. *Signal Transduct Target Ther* **5**, 209 (2020).
38. P. Gilchuk *et al.*, A Distinct Lung-Interstitial-Resident Memory CD8(+) T Cell Subset Confers Enhanced Protection to Lower Respiratory Tract Infection. *Cell Rep* **16**, 1800-1809 (2016).

39. Y. Sunami *et al.*, Hepatic activation of IKK/NFkappaB signaling induces liver fibrosis via macrophage-mediated chronic inflammation. *Hepatology* **56**, 1117-1128 (2012).
40. O. Herrmann *et al.*, IKK mediates ischemia-induced neuronal death. *Nat Med* **11**, 1322-1329 (2005).
41. G. Legname *et al.*, Inducible expression of a p56Lck transgene reveals a central role for Lck in the differentiation of CD4 SP thymocytes. *Immunity* **12**, 537-546 (2000).
42. K. M. Knudson *et al.*, NFkappaB-Pim-1-Eomesodermin axis is critical for maintaining CD8 T-cell memory quality. *Proc Natl Acad Sci U S A* **114**, E1659-E1667 (2017).
43. M. Lopez-Cabrera *et al.*, Transcriptional regulation of the gene encoding the human C-type lectin leukocyte receptor AIM/CD69 and functional characterization of its tumor necrosis factor-alpha-responsive elements. *J Biol Chem* **270**, 21545-21551 (1995).
44. E. Teixeira *et al.*, Different T Cell Receptor Signals Determine CD8+ Memory Versus Effector Development. *Science (New York, NY)* **323**, 502 (2009).
45. T. Gebhardt *et al.*, Different patterns of peripheral migration by memory CD4+ and CD8+ T cells. *Nature* **477**, 216-219 (2011).
46. F. E. Dijkgraaf, L. Kok, T. N. M. Schumacher, Formation of Tissue-Resident CD8(+) T-Cell Memory. *Cold Spring Harb Perspect Biol* **13** (2021).
47. P. C. Rosato, S. Wijeyesinghe, J. M. Stolley, D. Masopust, Integrating resident memory into T cell differentiation models. *Curr Opin Immunol* **63**, 35-42 (2020).
48. S. Iborra *et al.*, Optimal Generation of Tissue-Resident but Not Circulating Memory T Cells during Viral Infection Requires Crosspriming by DNGR-1(+) Dendritic Cells. *Immunity* **45**, 847-860 (2016).
49. J. E. Kohlmeier *et al.*, CXCR3 directs antigen-specific effector CD4+ T cell migration to the lung during parainfluenza virus infection. *J Immunol* **183**, 4378-4384 (2009).
50. B. J. Laidlaw *et al.*, CD4+ T cell help guides formation of CD103+ lung-resident memory CD8+ T cells during influenza viral infection. *Immunity* **41**, 633-645 (2014).
51. J. M. Schenkel *et al.*, IL-15-Independent Maintenance of Tissue-Resident and Boosted Effector Memory CD8 T Cells. *J Immunol* **196**, 3920-3926 (2016).
52. T. Adachi *et al.*, Hair follicle-derived IL-7 and IL-15 mediate skin-resident memory T cell homeostasis and lymphoma. *Nat Med* **21**, 1272-1279 (2015).
53. Y. Ito, K. Miyazono, RUNX transcription factors as key targets of TGF-beta superfamily signaling. *Curr Opin Genet Dev* **13**, 43-47 (2003).
54. R. El-Asady *et al.*, TGF- $\beta$ -dependent CD103 expression by CD8(+) T cells promotes selective destruction of the host intestinal epithelium during graft-versus-host disease. *J Exp Med* **201**, 1647-1657 (2005).
55. M. Bitzer *et al.*, A mechanism of suppression of TGF-beta/SMAD signaling by NF-kappa B/RelA. *Genes & development* **14**, 187-197 (2000).
56. S. Ghosh, M. S. Hayden, New regulators of NF-kappaB in inflammation. *Nat Rev Immunol* **8**, 837-848 (2008).
57. T. Liu, L. Zhang, D. Joo, S. C. Sun, NF-kappaB signaling in inflammation. *Signal Transduct Target Ther* **2** (2017).
58. J. W. Christman, R. T. Sadikot, T. S. Blackwell, The role of nuclear factor-kappa B in pulmonary diseases. *Chest* **117**, 1482-1487 (2000).
59. M. P. DeBerge, K. H. Ely, R. I. Enelow, Soluble, but not transmembrane, TNF-alpha is required during influenza infection to limit the magnitude of immune responses and the extent of immunopathology. *J Immunol* **192**, 5839-5851 (2014).

60. Y. Yang, J. Xu, Y. Niu, J. S. Bromberg, Y. Ding, T-bet and eomesodermin play critical roles in directing T cell differentiation to Th1 versus Th17. *J Immunol* **181**, 8700-8710 (2008).
61. B. Slutter *et al.*, Dynamics of influenza-induced lung-resident memory T cells underlie waning heterosubtypic immunity. *Sci Immunol* **2** (2017).
62. D. Masopust *et al.*, Dynamic T cell migration program provides resident memory within intestinal epithelium. *J Exp Med* **207**, 553-564 (2010).
63. J. M. Schenkel, K. A. Fraser, V. Vezys, D. Masopust, Sensing and alarm function of resident memory CD8(+) T cells. *Nat Immunol* **14**, 509-513 (2013).
64. S. Takamura, J. E. Kohlmeier, Establishment and Maintenance of Conventional and Circulation-Driven Lung-Resident Memory CD8(+) T Cells Following Respiratory Virus Infections. *Front Immunol* **10**, 733 (2019).
65. R. J. Hogan *et al.*, Activated antigen-specific CD8+ T cells persist in the lungs following recovery from respiratory virus infections. *J Immunol* **166**, 1813-1822 (2001).
66. Y. Aschner, G. P. Downey, Transforming Growth Factor-beta: Master Regulator of the Respiratory System in Health and Disease. *Am J Respir Cell Mol Biol* **54**, 647-655 (2016).
67. Q. Liu, Y. H. Zhou, Z. Q. Yang, The cytokine storm of severe influenza and development of immunomodulatory therapy. *Cell Mol Immunol* **13**, 3-10 (2016).
68. L. Wang *et al.*, IL-6 induces NF-kappa B activation in the intestinal epithelia. *J Immunol* **171**, 3194-3201 (2003).
69. S. K. Manna, G. T. Ramesh, Interleukin-8 induces nuclear transcription factor-kappaB through a TRAF6-dependent pathway. *J Biol Chem* **280**, 7010-7021 (2005).
70. D. C. Fajgenbaum, C. H. June, Cytokine Storm. *N Engl J Med* **383**, 2255-2273 (2020).
71. N. Lukan, "Cytokine storm", not only in COVID-19 patients. Mini-review. *Immunol Lett* **228**, 38-44 (2020).
72. T. Gebhardt, U. Palendira, D. C. Tschärke, S. Bedoui, Tissue-resident memory T cells in tissue homeostasis, persistent infection, and cancer surveillance. *Immunol Rev* **283**, 54-76 (2018).



## Figures and Tables

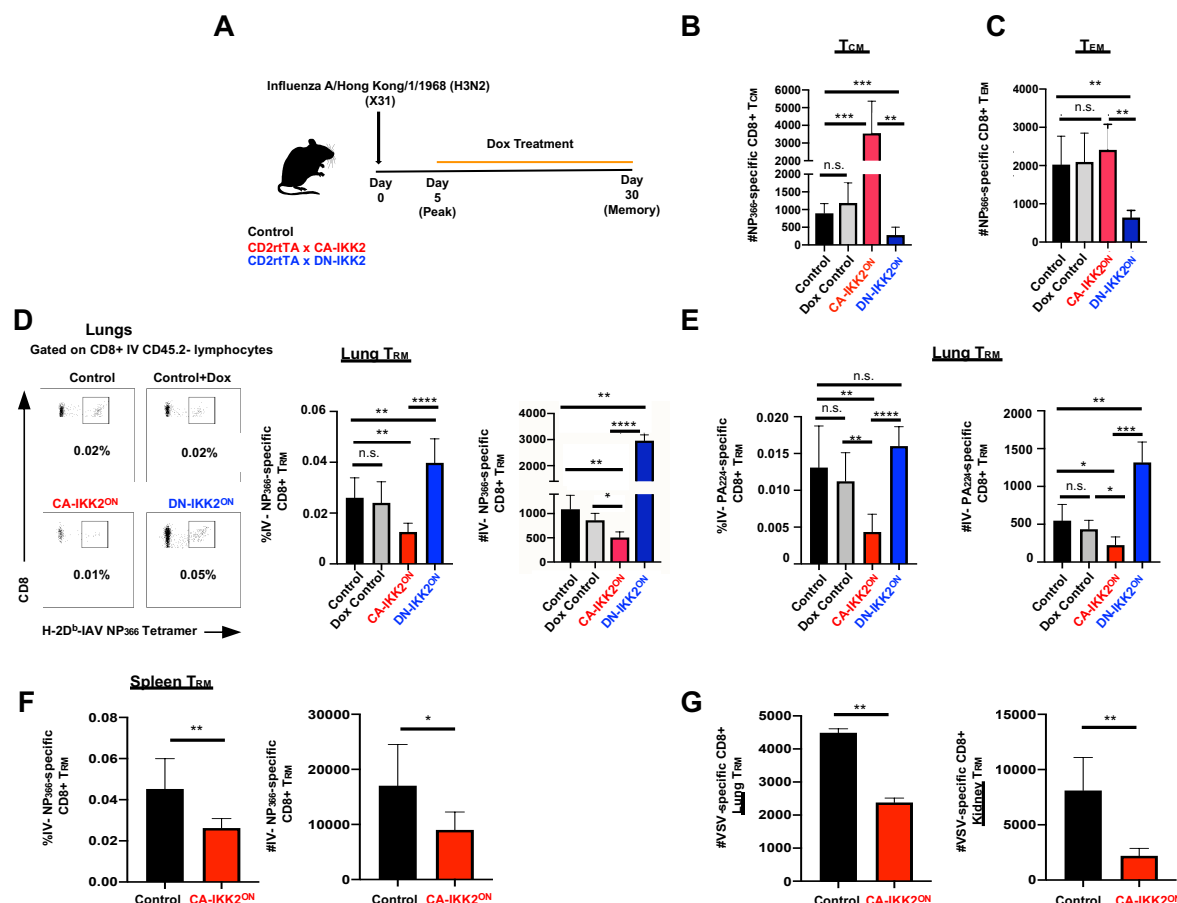

**Figure 1. NFkB signaling differentially regulates T cell memory subset diversity.** Groups of control, CD2rtTA x CA-IKK2 or CD2rtTA x DN-IKK2 mice ( $n \geq 3$  mice per group) were infected with influenza x31. From day 5-30 p.i., mice were fed a doxycycline containing diet (control littermates+dox, CA-IKK2<sup>ON</sup> or DN-IKK2<sup>ON</sup> CD8 T cells) or control diet (CD2rtTA x CA-IKK2; CD2rtTA x DN-IKK2 or control littermates fed with regular chow) (A). At 30 days p.i., the numbers of influenza NP<sub>366-374</sub>-specific central (CD8+ Db-NP-tet+ CD44<sup>hi</sup> CD62L<sup>hi</sup> T<sub>CM</sub>) (B) and effector (CD8+ Db-NP-tet+ CD44<sup>hi</sup> CD62L<sup>lo</sup> T<sub>EM</sub>) (C) memory subsets were distinguished by flow cytometry in mediastinal lymph nodes. (D-F) Resident memory T cells (T<sub>RM</sub>) were identified in x31-infected mice by intravascular staining with CD45.2-specific, PE-labeled antibody injection prior to euthanasia. Frequencies and numbers of NP<sub>366-374</sub>-specific (D) and PA<sub>224-233</sub>-specific (E) CD8 T<sub>RM</sub>-cells were determined in lungs (Db-NP/PA-tetramers+ CD8+ CD45.2-) by flow cytometry. (F) Frequencies and numbers of NP<sub>366-374</sub>-specific CD8+ T<sub>RM</sub> in the spleens. Representative data shown from 3 independent experiments. (G) Groups of control or CD2rtTA x CA-IKK2 (CA-IKK2<sup>ON</sup>) mice were infected with VSV. Mice were fed a doxycycline-containing diet from days 5 – 30 p.i.. At 30 days p.i., VSV-specific CD8+ T<sub>RM</sub> (Kb-N-tet+ CD8+ CD45.2-) were identified in the lungs and kidneys of infected mice by iv. labelling. Representative data from 3 independent experiments. \* p < 0.05, \*\* p < 0.01, \*\*\* p < 0.001, n.s. not significant.

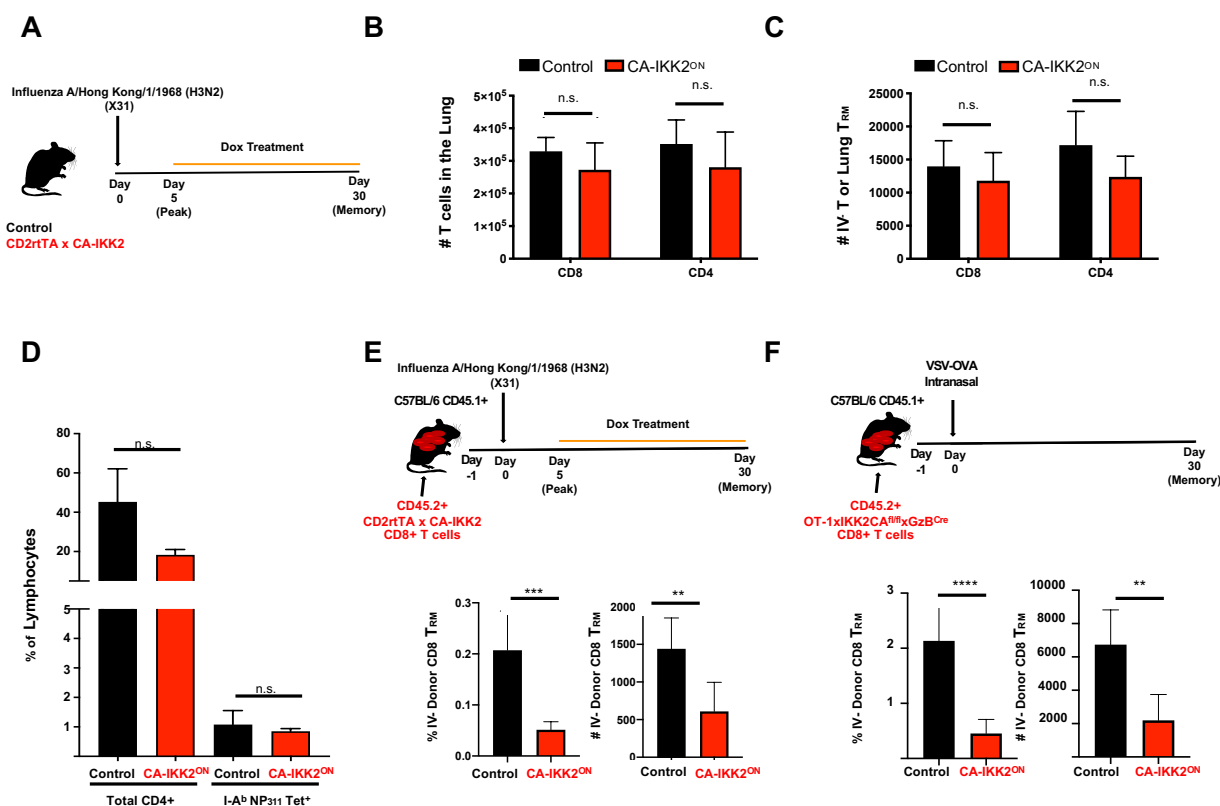

**Figure 2. Impairment in the generation of CD8 T<sub>RM</sub> under enhanced NFkB signals is T cell intrinsic.** (A) Groups of control or CD2rtTA x CA-IKK2 mice were infected intranasally with influenza x31 (15000 pfu). From day 5-30 p.i, mice were fed a doxycycline containing diet (CA-IKK2<sup>ON</sup>) or control diet. (B-C) Number of total and resident CD8 and CD4 memory T cells (T<sub>RM</sub>) in the lungs of infected mice, the latter determined by intravascular staining. (D) Total and Influenza virus NP<sub>311-325</sub>-specific CD4 positive T cells determined by flow cytometry upon Influenzax31 infection (5000pfu). (E) CD8<sup>+</sup> naïve T cells from CD2rtTAxCA-IKK2 mice were adoptively transferred to congenic host mice. The recipients were infected with influenza x31. Groups of recipients were fed doxycycline-containing or control diets from days 5-30 p.i. At day 30 p.i., frequency and number of lung CD8<sup>+</sup> donor T<sub>RM</sub> cells were determined i by intravenous labeling with anti-CD8b PE-labelled antibodies. (F) OT-1 naïve CD8<sup>+</sup> T cells isolated from OT-1xIKK2CA<sup>fl/fl</sup>xGzB<sup>Cre</sup> mice were adoptively transferred to congenic hosts followed by intranasal VSV-OVA infection. At 30 days p.i., lung donor OT-1 cells were identified by intravascular staining. n ≥ 2 experiments with n≥3 mice per group. \*\* p < 0.01, \*\*\* p < 0.001, n.s. not significant.

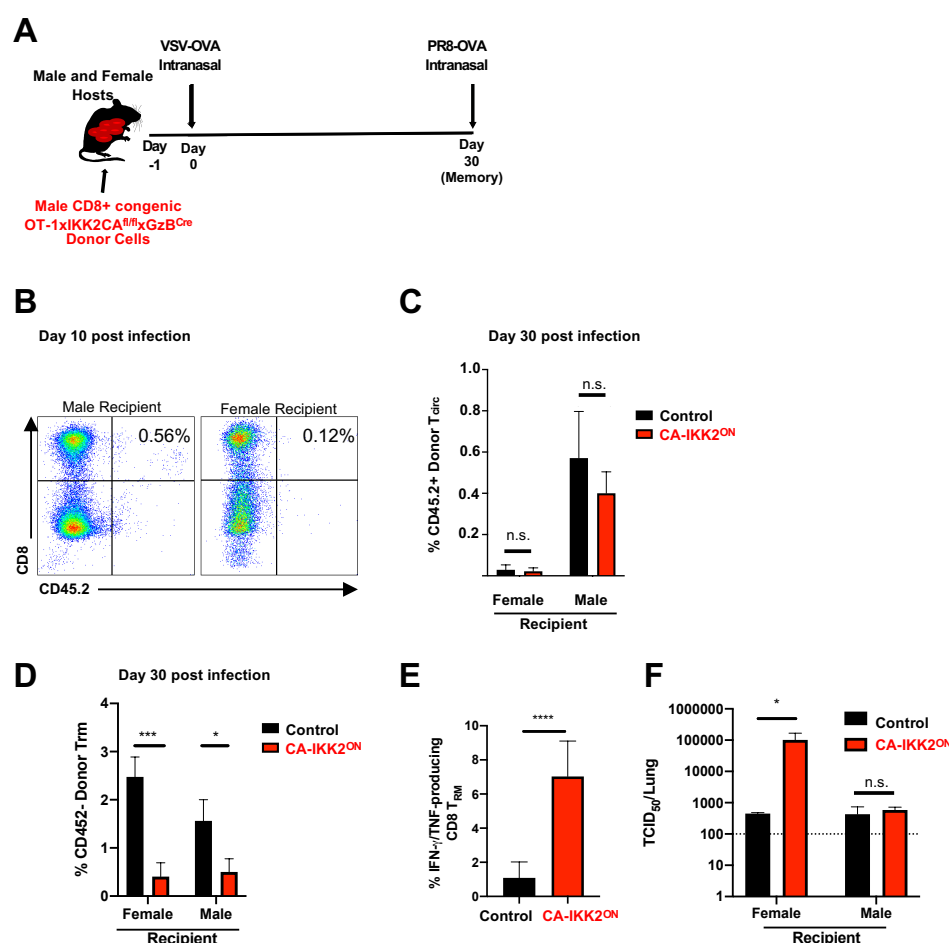

**Figure 3. Enhancing NFκB signaling reduces T<sub>RM</sub> and compromises protection against heterologous infection.** (A) CD8 naive T cells from male OT-1xIKK2CA<sup>fl/fl</sup>xGzB<sup>Cre</sup> or OT-1 littermate control naïve cells were adoptively transferred into groups of congenically marked male and female hosts, followed by intranasal VSV-OVA infection. Rejection of circulating cells was determined in all mice at day 10 p.i. (B). Frequency of circulating donor OT-1 CD8 T cells was assessed in the mediastinal lymph nodes at day 30 p.i., (C) and lung-resident, donor CD8 T-cells were determined by intravascular staining. (D). Frequency of IFNγ and TNF double positive OT-1 CD8<sup>+</sup> T<sub>RM</sub> expressors at day 30 p.i. upon *ex vivo* antigen stimulation (E). A subset of mice from each group (n=5) were challenged with influenza PR8-OVA. Virus titers in the lungs were determined 2.5 days post-challenge (f). Data shown in pooled from ≥ 2 experiments, n=10 mice per group, per experiment. \* p < 0.05, \*\*\* p < 0.001, n.s. not significant.

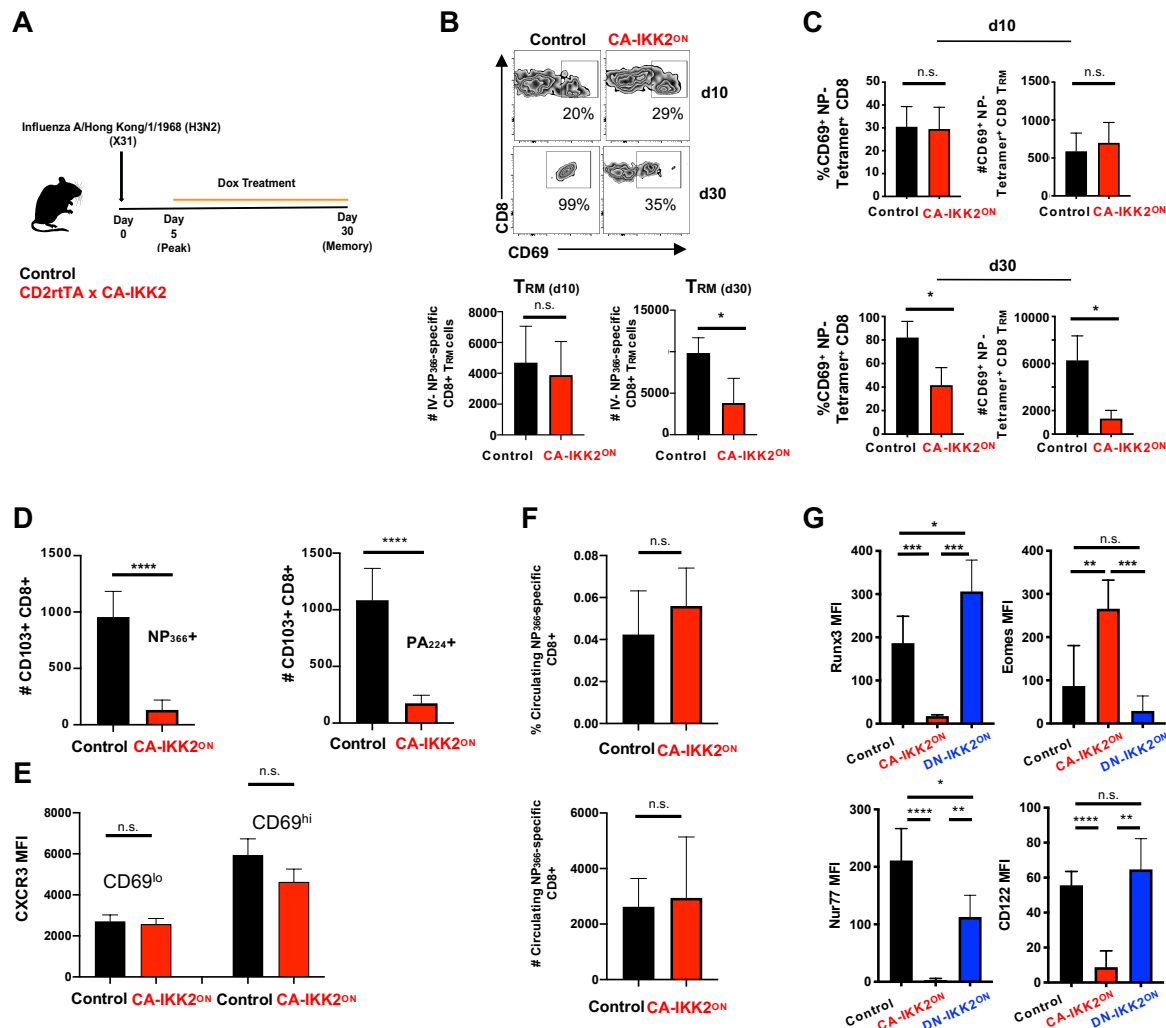

**Figure 4. NFkB signaling regulates CD8 T<sub>RM</sub> transcriptional programming.** (A) Experimental Procedure. (B) Groups of control or CD2rtTA x CA-IKK2 mice (n≥3mice per group) were infected with influenza x31 and treated (CA-IKK2<sup>ON</sup>) or not with a doxycycline diet from day 5-30 p.i. Control and CA-IKK2<sup>ON</sup> Influenza-specific CD8 T<sub>RM</sub> cells were identified by intravascular labelling and NP<sub>366-374</sub>-specific and PA<sub>224-233</sub>-specific tetramers, and anti-CD8 antibodies by flow cytometry. Dot plot shows frequency of CD8<sup>+</sup> CD69<sup>+</sup> control and CA-IKK2<sup>ON</sup> T cells at day 10 and day 30 p.i.. Graph shows number of influenza specific lung T<sub>RM</sub> cells at day 10 and 30 p.i.. (C) Frequency and number of CD69 positive NP<sub>366-374</sub>-specific CD8 T<sub>RM</sub> at 10- (top) and 30-days p.i. (bottom) in lung. (D) Number of Influenza specific-CD103<sup>+</sup> CD8 T<sub>RM</sub> cells was determined among NP<sub>366-374</sub>-specific and PA<sub>224-233</sub>-specific CD8<sup>+</sup> T cell populations in the lungs 30 days p.i. (E) Expression of CXCR3 in CD69<sup>lo</sup> and CD69<sup>hi</sup> populations at day 30 p.i. in lung influenza specific CD8 T<sub>RM</sub>. (F) Frequencies and numbers of circulating, NP<sub>366-374</sub>-specific CD8 T cells determined at day 30 p.i. in lung (G) Expression of lung CD8 T<sub>RM</sub> – associated transcription factors and CD122 determined at 30 days p.i. Data is representative of ≥ 2 independent experiments. \* p < 0.05, \*\* p < 0.01, \*\*\* p < 0.001, \*\*\*\* p < 0.0001, n.s. not significant.

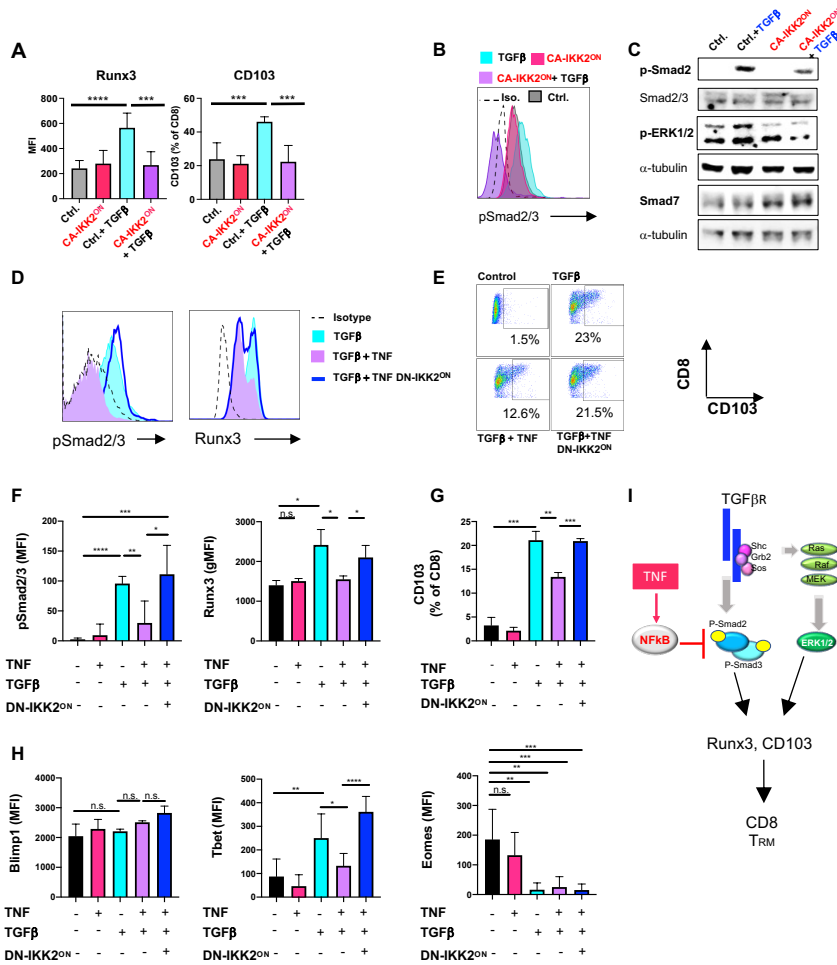

**Figure 5. TNF and NFκB signaling inhibit TGFβ signaling and downstream T<sub>RM</sub> markers, CD103 and Runx3.** (A-C) Splenocytes from OT-1 (control) or OT-1xIKK2<sup>fl/fl</sup>xGzB<sup>Cre</sup> mice (CA-*IKK2*<sup>ON</sup> samples) were stimulated for 48 hours with OVA peptide to generate effector CD8 T cells that were next stimulated with TGFβ (A) Expression of Runx3 and CD103 (MFI) were determined 24 hours after. (B) Histograms show phosphorylated levels of Smad2/3 30 minutes following TGFβ stimulation on control (blue) or CA-*IKK2*<sup>ON</sup> CD8 T cells. (C) phospho-Smad2 and -ERK1/2, expression of Smad7 and loading control tubulin were determined by immunoblot with specific antibodies after 30 minutes of TGFβ stimulation. (D-I) Splenocytes from CD2rtTA x DN-*IKK2* and control mice were stimulated with anti-CD3/ CD28-specific antibodies. 1 day later, cells were treated or not with TNF and doxycycline for another 24 hours. TGFβ was then added to indicated samples. Histograms show phospho-Smad2/3 and Runx3 levels on CD8 T cells 30 minutes post-TGFβ addition (D). (E) Dot plots show frequency of CD8+ CD103+ CD8 T cells in the conditions shown. (F-H) Levels of phospho-Smad2/3, Runx3, Blimp-1, Tbet and Eomes as well as % of CD103+ CD8 T cells were determined 24 hours post- TGFβ stimulation. (i) Working model. Data shown is pooled from ≥ 2 experiments of n ≥ 3 independent experiments. \* p < 0.05, \*\* p < 0.01, \*\*\* p < 0.001, \*\*\*\* p < 0.0001, n.s. not significant.



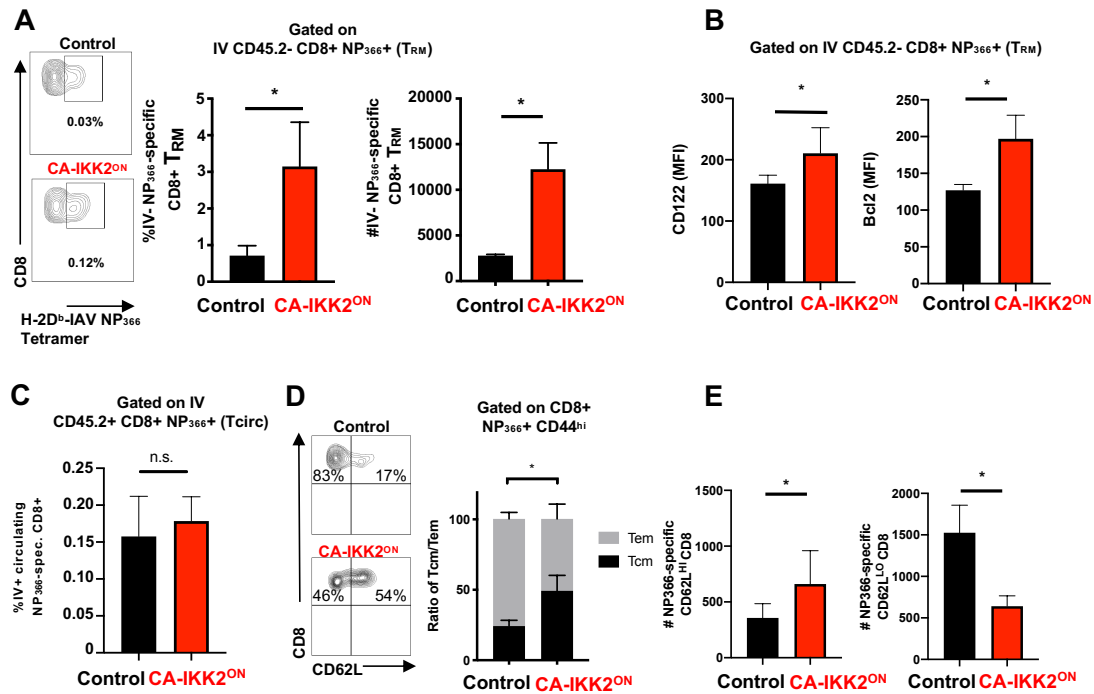

**Figure 6. Increasing NFkB signaling at memory improves CD8 T<sub>RM</sub> survival.** Groups of control or CD2rtTA x CA-IKK2 mice ( $n \geq 3$  mice per group) were infected with influenza x31. At day 30 p.i. mice were fed a doxycycline (CA-IKK2<sup>ON</sup>) or a control containing diet for 15 days. (A) Frequencies and numbers of influenza specific CD8 T<sub>RM</sub> identified by intravascular staining in lungs. (B) Bcl2 and CD122 expression on lung CD8 T<sub>RM</sub>. (C) Frequency of circulating NP<sub>366-374</sub>-specific CD8 T cells determined in the lungs by intravascular labeling. (D-E) Frequency, ratio and number of NP<sub>366-374</sub>-specific CD8<sup>+</sup> T<sub>CM</sub> (CD8<sup>+</sup> Db-NP-tet<sup>+</sup> CD44<sup>hi</sup> CD62L<sup>hi</sup>) and T<sub>EM</sub> in mediastinal lymph nodes. (Representative data shown from  $\geq 2$  experiments. \*  $p < 0.05$ , n.s. not significant).
